### **S1 Appendix: Sampling sites and genotypes analysed**

Sampling in Guinea-Bissau was carried out at: i) nine sites in GB\_Cantanhez (N = 71 genotypes, average number of genotypes per sampling site = 7.89, varying between 3 and 13, average distance between sampling sites = 15.9 km, varying between 3.2 and 32.3 km), ii) five sites at GB\_Cufada (N = 51 genotypes, average number of genotypes per sampling site = 10.2, varying between 3 and 21, average distance between sampling sites = 19.9 km, varying between 2.3 and 27.8 km), and iii) three sites at GB\_Boé (N = 21 genotypes, average number of genotypes per sampling site = 7, varying between 5 and 11, average distance between sampling sites = 9.6 km, varying between 6.1 and 14.3 km).

In SEN, sampling was carried out at five sampling sites in an almost continuous design (N = 165 genotypes, average number of genotypes per sampling site = 33, varying between 108 and 11, the average distance between sampling sites = 18.1 km, varying between 4.1 and 65.0 km).

Supporting Information: Disrupted dispersal and its genetic consequences: comparing protected and threatened baboon populations (*Papio papio*) in West Africa

**S1 Table A: Name of sampling sites within each country and number of unique multi-locus genotypes.** Sampling sites in Guinea-Bissau are numbered as in Fig A

| Country                    | Sampling Location          | Name of sampling site | Number of Genotypes |           |
|----------------------------|----------------------------|-----------------------|---------------------|-----------|
| Senegal                    | Niokolo Koba National Park | Camp du Lion          | 11                  |           |
|                            |                            | Gue Damantan          | 11                  |           |
|                            |                            | Lingue Kountou        | 13                  |           |
|                            |                            | Niokolo               | 22                  |           |
|                            |                            | Simenti               | 108                 |           |
| <b>Total Senegal</b>       |                            |                       | <b>165</b>          |           |
| Guinea-Bissau              | Cantanhez                  | 1. Porto Gandamael    | 13                  |           |
|                            |                            | 2. Amindara           | 7                   |           |
|                            |                            | 3. Cabedu             | 8                   |           |
|                            |                            | 4. Catomboi           | 10                  |           |
|                            |                            | 5. Canamina           | 10                  |           |
|                            |                            | 6. Caiquene           | 3                   |           |
|                            |                            | 7. Cambeque           | 6                   |           |
|                            |                            | 8. Quebo-Sutuba       | 4                   |           |
|                            |                            | 9. Botche-Cule        | 10                  |           |
|                            | <b>Total Cantanhez</b>     |                       |                     | <b>71</b> |
|                            | Cufada                     |                       | 10. Bubatchingue    | 21        |
|                            |                            |                       | 11. Bakar Contê     | 10        |
|                            |                            |                       | 12. Guebombol       | 3         |
|                            |                            |                       | 13. Sr. Soares 1    | 7         |
|                            |                            |                       | 14. Sr. Soares 2    | 10        |
|                            | <b>Total Cufada</b>        |                       |                     | <b>51</b> |
|                            | Boé                        |                       | 15. Boé Beli        | 5         |
| 16. Boé Aicum              |                            |                       | 11                  |           |
| 17. Boé Aicum Montanha     |                            |                       | 5                   |           |
| <b>Total Boé</b>           |                            |                       | <b>21</b>           |           |
| <b>Total Guinea-Bissau</b> |                            |                       | <b>143</b>          |           |

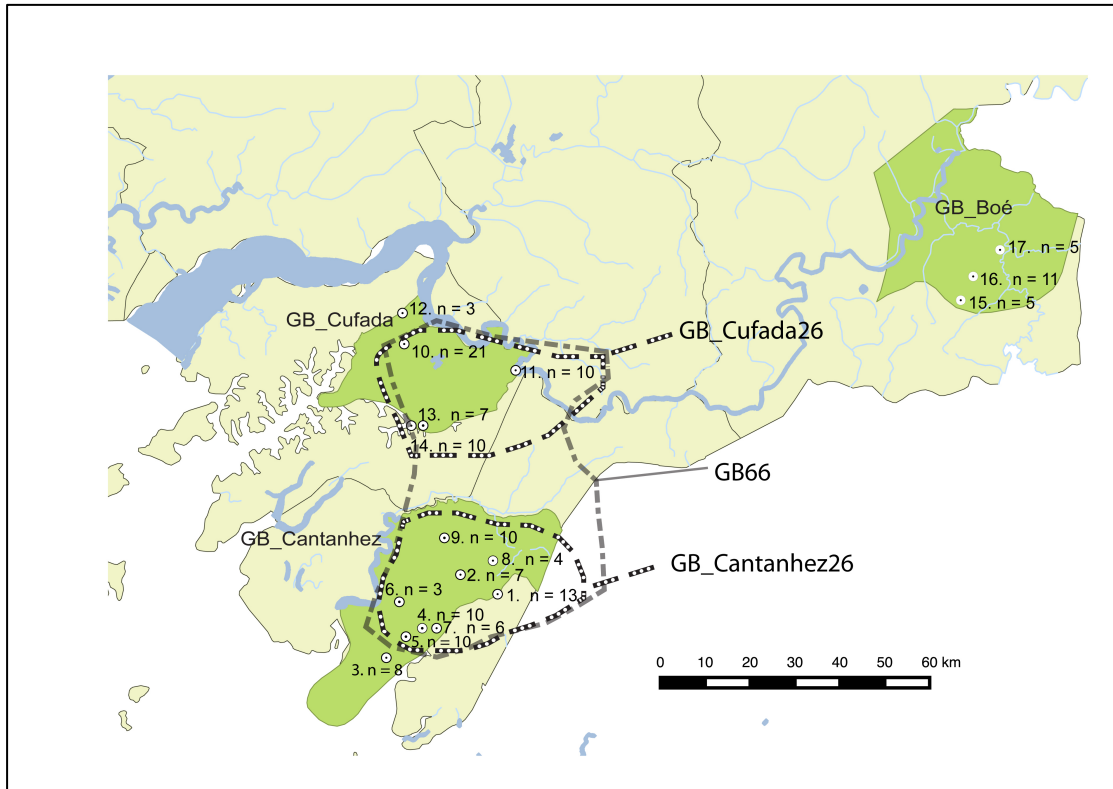

**S1 Figure A. Sampling locations in GB.** Sample size and grouping of samples that form subsets of samples in GB (GB66, GB\_Cantanez26 and GB\_Cufada26). The sampling sites are numbered as in Table S1A. Produced using QGIS.

Supporting Information: Disrupted dispersal and its genetic consequences: comparing protected and threatened baboon populations (*Papio papio*) in West Africa

**S1 Table B: Matrix of linear distance in km between sampling sites in GB.** 1- Porto Gandamael, 2- Amindara, 3 - Cabedu, 4 Catomboi, 5 - Canamina, 6 - Caiquene, 7 - Cambeque, 8 - Quebo-Sutuba, 9 - Botche-Cule, 10 - Bubatchingue, 11- Bakar Contê, 12 - Guebambol, 13 - Sr. Soares 1, 14 - Sr. Soares 2, 15 - Boé Beli, 16 - Boé Aicum, 17 - Boé Aicum Montanha. At the top of table is indicated the name of the sub-set of samples (GB165, GB66, GB\_Cantanhez26 and GB\_Cufada26) and the dashed or broken vertical lines delimitate which sampling sites are included in the respective sub-set. The maximum linear distance between sampling sites is highlighted in bold. The underlined sampling sites are included in GB165 but not in GB66, GB\_Cantanhez26 and GB\_Cufada26.

| GB165          |             |              |             |             |             |             |             |             |             |             |           |       |       |      |     |           |    |
|----------------|-------------|--------------|-------------|-------------|-------------|-------------|-------------|-------------|-------------|-------------|-----------|-------|-------|------|-----|-----------|----|
| GB66           |             |              |             |             |             |             |             |             |             |             |           |       |       |      |     |           |    |
| GB_Cantanhez26 |             |              |             |             |             |             |             |             | GB_Cufada26 |             |           |       |       |      |     |           |    |
| 1              | 2           | <u>3</u>     | 4           | 5           | 6           | 7           | 8           | 9           | 10          | 11          | <u>12</u> | 13    | 14    | 15   | 16  | 17        |    |
| 0.0            |             |              |             |             |             |             |             |             |             |             |           |       |       |      |     | 1         |    |
| 9.3            | 0.0         |              |             |             |             |             |             |             |             |             |           |       |       |      |     | 2         |    |
| 28.6           | 25.0        | 0.0          |             |             |             |             |             |             |             |             |           |       |       |      |     | <u>3</u>  |    |
| 18.4           | 14.8        | 10.4         | 0.0         |             |             |             |             |             |             |             |           |       |       |      |     | 4         |    |
| 22.6           | 18.6        | 6.4          | 4.1         | 0.0         |             |             |             |             |             |             |           |       |       |      |     | 5         |    |
| 22.0           | 15.0        | 12.9         | 7.8         | 8.0         | 0.0         |             |             |             |             |             |           |       |       |      |     | 6         |    |
| 15.6           | 13.3        | 13.0         | 3.2         | 7.1         | 10.2        | 0.0         |             |             |             |             |           |       |       |      |     | 7         |    |
| 7.6            | 7.8         | 32.2         | 21.9        | <b>25.9</b> | 22.8        | 19.7        | 0.0         |             |             |             |           |       |       |      |     | 8         |    |
| 17.3           | 9.0         | 29.9         | 20.9        | 23.8        | 17.6        | 20.4        | 12.0        | 0.0         |             |             |           |       |       |      |     | 9         |    |
| 60.2           | 53.3        | <u>70.7</u>  | 64.1        | <b>65.9</b> | 58.0        | 64.4        | 52.6        | 44.5        | 0.0         |             |           |       |       |      |     | 10        |    |
| 50.4           | 47.4        | <u>70.6</u>  | 61.4        | 64.5        | 58.0        | 60.5        | 43.0        | 40.7        | 25.1        | 0.0         |           |       |       |      |     | 11        |    |
| 66.6           | <u>60.1</u> | <u>77.5</u>  | <u>70.9</u> | <u>72.7</u> | <u>64.9</u> | <u>71.2</u> | <u>59.1</u> | <u>51.3</u> | 6.9         | 27.8        | 0.0       |       |       |      |     | <u>12</u> |    |
| 41.4           | 34.5        | 52.9         | 45.6        | 47.7        | 40.1        | 45.8        | 34.1        | 25.7        | 18.8        | 23.6        | 25.6      | 0.0   |       |      |     | 13        |    |
| 42.5           | 35.3        | 52.6         | 45.7        | 47.6        | 39.8        | 46.0        | 35.4        | 26.3        | 18.4        | <b>25.9</b> | 25.3      | 2.6   | 0.0   |      |     | 14        |    |
| 122.4          | 127.1       | 151.0        | 140.6       | 144.8       | 142.1       | 138.0       | 119.4       | 126.6       | 124.0       | 100.5       | 124.0     | 122.7 | 125.2 | 0.0  |     | 15        |    |
| 127.7          | 132.2       | 156.2        | 145.9       | 150.0       | 147.1       | 143.2       | 124.5       | 131.5       | 127.3       | 104.2       | 127.0     | 126.7 | 129.2 | 6.1  | 0.0 | 16        |    |
| 136.0          | 140.3       | <b>164.5</b> | 154.1       | 158.2       | 155.3       | 151.5       | 132.7       | 139.5       | 134.1       | 111.4       | 133.5     | 134.1 | 136.6 | 14.3 | 8.2 | 0.0       | 17 |

**S1 Table C: Matrix of linear distances in km between sampling sites in SEN.** At the top is indicated the name of the sub-set of samples (SEN66 and SEN26) and vertical lines delimitate which sampling sites are included in the respective sub-set of samples. The maximum linear distance between sampling sites is highlighted in bold.

| <b>SEN66</b> |         |              |                |                |
|--------------|---------|--------------|----------------|----------------|
| <b>SEN26</b> |         |              |                |                |
| Camp du Lion | Simenti | Gue Damantan | Lingue Kountou | Niokolo        |
| 5.3          | 0.0     |              |                | Simenti        |
| 8.9          | 3.9     | 0.0          |                | Gue Damantan   |
| 17.0         | 22.35   | <b>25.8</b>  | 0.0            | Lingue Kountou |
| 56.3         | 61.6    | <b>65.0</b>  | 39.3           | 0.0<br>Niokolo |
