Supporting Information: Disrupted dispersal and its genetic consequences: comparing protected and threatened baboon populations (*Papio papio*) in West Africa

## S5 Appendix: Genetic diversity

**S5 Table A: Genetic diversity per locus for the GB165 and SEN66 datasets.** AR (Allelic Richness),  $H_o$  and  $H_e$  (observed and expected heterozygosity) are indicated per locus and across loci (Overall). HWE - tests for Hardy Weinberg Equilibrium deviation. NS - not significant, \*  $P < 0.05$ , \*\*  $P < 0.01$ , \*\*\*  $P < 0.001$ . 1 GB165 includes all samples collected in Guinea-Bissau at 165 km scale. SEN66 includes all samples collected in Senegal at 66 km scale.

| Loci    | AR      |          | $H_o$     |           | $H_e$     |           | HWE   |       |
|---------|---------|----------|-----------|-----------|-----------|-----------|-------|-------|
|         | GB165   | SEN66    | GB165     | SEN66     | GB165     | SEN66     | GB165 | SEN66 |
| D12S375 | 6       | 5        | 0.57      | 0.76      | 0.60      | 0.77      | *     | **    |
| D7S503  | 5       | 7        | 0.46      | 0.79      | 0.52      | 0.76      | NS    | NS    |
| D3S1766 | 5       | 3        | 0.61      | 0.36      | 0.66      | 0.36      | NS    | NS    |
| D13S765 | 4       | 5        | 0.63      | 0.5       | 0.59      | 0.49      | NS    | NS    |
| D10S611 | 3       | 4        | 0.30      | 0.65      | 0.35      | 0.53      | NS    | *     |
| D6S501  | 5       | 5        | 0.68      | 0.72      | 0.66      | 0.67      | NS    | *     |
| D8S1106 | 4       | 5        | 0.60      | 0.54      | 0.60      | 0.55      | NS    | NS    |
| D3S1768 | 5       | 5        | 0.50      | 0.60      | 0.50      | 0.54      | NS    | *     |
| D7S2204 | 5       | 6        | 0.64      | 0.74      | 0.60      | 0.74      | NS    | NS    |
| D5S1457 | 4       | 4        | 0.51      | 0.50      | 0.53      | 0.43      | NS    | NS    |
| D4S243  | 5       | 7        | 0.72      | 0.82      | 0.70      | 0.71      | NS    | ***   |
| D2S1326 | 4       | 7        | 0.48      | 0.60      | 0.55      | 0.55      | *     | NS    |
| D14S306 | 6       | 6        | 0.69      | 0.54      | 0.78      | 0.58      | *     | NS    |
| Overall | 4.7±0.2 | 5.31±0.4 | 0.57±0.03 | 0.62±0.04 | 0.59±0.03 | 0.59±0.04 |       |       |

Supporting Information: Disrupted dispersal and its genetic consequences: comparing protected and threatened baboon populations (*Papio papio*) in West Africa

**S5 Table B:  $H_o$  and  $H_e$  (observed and expected heterozygosity) and tests for Hardy Weinberg deviation (HW) for each of the clusters detected by STRUCTURE (Delta K criterion) in SEN66.** NS - not significant, \*  $P < 0.05$ , \*\*  $P < 0.01$ . SI - Simenti, CL - Camp du Lion, GD - Gue Damantan, LK - Lingue Kountou, NK - Niokolo.

| Loci    | SI+CL+GD+LK |       |    | NK    |       |     |
|---------|-------------|-------|----|-------|-------|-----|
|         | $H_o$       | $H_e$ | HW | $H_o$ | $H_e$ | HWE |
| D12S375 | 0.76        | 0.77  | ** | 0.77  | 0.72  | NS  |
| D7S503  | 0.78        | 0.77  | NS | 0.82  | 0.70  | NS  |
| D3S1766 | 0.38        | 0.38  | NS | 0.23  | 0.27  | NS  |
| D13S765 | 0.52        | 0.50  | NS | 0.41  | 0.42  | NS  |
| D10S611 | 0.61        | 0.52  | NS | 0.91  | 0.59  | *   |
| D6S501  | 0.73        | 0.67  | NS | 0.59  | 0.61  | NS  |
| D8S1106 | 0.53        | 0.53  | NS | 0.62  | 0.55  | NS  |
| D3S1768 | 0.56        | 0.51  | NS | 0.86  | 0.67  | NS  |
| D7S2204 | 0.77        | 0.73  | NS | 0.50  | 0.58  | NS  |
| D5S1457 | 0.44        | 0.42  | NS | 0.73  | 0.52  | NS  |
| D4S243  | 0.80        | 0.67  | NS | 0.91  | 0.75  | NS  |
| D2S1326 | 0.58        | 0.51  | NS | 0.65  | 0.59  | NS  |
| D14S306 | 0.53        | 0.57  | NS | 0.59  | 0.58  | NS  |

Supporting Information: Disrupted dispersal and its genetic consequences: comparing protected and threatened baboon populations (*Papio papio*) in West Africa

**S5 Table C: Genetic Diversity per sampling location.** Table shows the mean over 13 microsatellite loci  $\pm$  Standard error of  $N$  (genotypes),  $N_a$  (number of alleles),  $N_e$  (number of effective alleles), observed ( $H_o$ ), expected ( $H_e$ ) and unbiased expected heterozygosity ( $UH_e$ ), coefficient of inbreeding ( $F_{is}$ ) estimated per geographically distinct localities (SEN, GB\_Cantanhez, GB\_Cufada and GB\_Boé) and separately for males and females.

| <i>Locations</i> | $N$              | $N_a$           | $N_e$           | $H_o$            | $H_e$            | $UH_e$           | $F_{is}$           |
|------------------|------------------|-----------------|-----------------|------------------|------------------|------------------|--------------------|
| SEN              | 163.9 $\pm$ 0.35 | 5.31 $\pm$ 0.35 | 2.71 $\pm$ 0.26 | 0.62 $\pm$ 0.04  | 0.59 $\pm$ 0.04  | 0.59 $\pm$ 0.04  | -0.055 $\pm$ 0.02  |
| GB_Cantanhez     | 70.1 $\pm$ 1.1   | 4.15 $\pm$ 0.22 | 2.39 $\pm$ 0.24 | 0.55 $\pm$ 0.04  | 0.54 $\pm$ 0.04  | 0.55 $\pm$ 0.04  | -0.003 $\pm$ 0.028 |
| GB_Cufada        | 53.0 $\pm$ 0.47  | 4.46 $\pm$ 0.29 | 2.59 $\pm$ 0.19 | 0.60 $\pm$ 0.04  | 0.59 $\pm$ 0.03  | 0.59 $\pm$ 0.03  | -0.025 $\pm$ 0.018 |
| GB_Boé           | 19.9 $\pm$ 0.96  | 4.31 $\pm$ 0.31 | 2.65 $\pm$ 0.18 | 0.55 $\pm$ 0.043 | 0.60 $\pm$ 0.023 | 0.62 $\pm$ 0.024 | 0.098 $\pm$ 0.052  |
| Males            |                  |                 |                 |                  |                  |                  |                    |
| SEN              | 96.46 $\pm$ 0.24 | 5.23 $\pm$ 0.30 | 2.71 $\pm$ 0.20 | 0.62 $\pm$ 0.04  | 0.59 $\pm$ 0.03  | 0.60 $\pm$ 0.03  | -0.04 $\pm$ 0.03   |
| GB_Cantanhez     | 23.3 $\pm$ 0.31  | 3.69 $\pm$ 0.21 | 2.20 $\pm$ 0.19 | 0.51 $\pm$ 0.04  | 0.51 $\pm$ 0.04  | 0.52 $\pm$ 0.04  | 0.00 $\pm$ 0.04    |
| GB_Cufada        | 16.54 $\pm$ 0.18 | 4.15 $\pm$ 0.25 | 2.79 $\pm$ 0.16 | 0.59 $\pm$ 0.03  | 0.62 $\pm$ 0.02  | 0.64 $\pm$ 0.02  | 0.06 $\pm$ 0.03    |
| GB_Boé           | 12.50 $\pm$ 0.5  | 4.08 $\pm$ 0.26 | 2.53 $\pm$ 0.16 | 0.48 $\pm$ 0.05  | 0.59 $\pm$ 0.02  | 0.62 $\pm$ 0.02  | 0.20 $\pm$ 0.07    |
| Females          |                  |                 |                 |                  |                  |                  |                    |
| SEN              | 67.46 $\pm$ 0.14 | 4.77 $\pm$ 0.40 | 2.69 $\pm$ 0.30 | 0.63 $\pm$ 0.05  | 0.58 $\pm$ 0.04  | 0.59 $\pm$ 0.04  | -0.08 $\pm$ 0.02   |
| GB_Cantanhez     | 44.92 $\pm$ 0.74 | 4.10 $\pm$ 0.24 | 2.45 $\pm$ 0.24 | 0.57 $\pm$ 0.04  | 0.56 $\pm$ 0.03  | 0.56 $\pm$ 0.03  | -0.03 $\pm$ 0.03   |
| GB_Cufada        | 33.54 $\pm$ 0.27 | 4.08 $\pm$ 0.24 | 2.44 $\pm$ 0.18 | 0.62 $\pm$ 0.04  | 0.56 $\pm$ 0.03  | 0.57 $\pm$ 0.04  | -0.12 $\pm$ 0.04   |
| GB_Boé           | 7.0 $\pm$ 0.45   | 3.39 $\pm$ 0.29 | 2.64 $\pm$ 0.28 | 0.69 $\pm$ 0.06  | 0.57 $\pm$ 0.04  | 0.62 $\pm$ 0.04  | -0.21 $\pm$ 0.08   |

Supporting Information: Disrupted dispersal and its genetic consequences: comparing protected and threatened baboon populations (*Papio papio*) in West Africa
