# Supplementary material for: Disrupted dispersal and its genetic consequences: Comparing protected and threatened baboon populations (Papio papio) in West Africa
Source: PLOS journal article supplement (doi:10.1371/journal.pone.0194189), 2018-04-03
Supplement: S2 (10.1371/journal.pone.0194189.s002) [file journal.pone.0194189.s002]

## S2 Appendix: Description of PCRs protocols and genotyping process

### PCRs protocols

**S2 Table A PCR protocols.** PCR protocols followed Ferreira da Silva et al. (2014) and Koop et al. (2015). Five multiplexes PCR systems were used (M1 to M5). The annealing temperature (AT), loci identifier, GenBank code, final concentration (in  $\mu\text{M}$ ), allelic range (base pairs) are reported.

| PCRs | AT    | Locus   | GenBank | Final concentrations | Allelic range  |
|------|-------|---------|---------|----------------------|----------------|
| M1   | 57 °C | D13S765 | G09003  | 0.2                  | 200-212        |
|      |       | D12S375 | G08936  | 0.1                  | 164-184        |
|      |       | D3S1766 | G08269  | 0.1                  | 192-208        |
|      |       | D7S503  | G18277  | 0.6                  | 142-156        |
| M2   | 55 °C | D2S1326 | G08136  | 0.3                  | 192-208        |
|      |       | D14S306 | G09055  | 0.2                  | 161-181        |
| M3   | 59 °C | D8S1106 | G09378  | 0.1                  | 149-161        |
|      |       | D6S501  | G08551  | 0.5                  | 171-187        |
|      |       | D10S611 | G08794  | 0.1                  | 129-137        |
| M4   | 57 °C | D5S1457 | G08431  | 0.1                  | 125-137        |
|      |       | D7S2204 | G08635  | 0.4                  | 230-250        |
|      |       | D3S1768 | G08287  | 0.1                  | 193-212        |
| M5*  | 58 °C | D4S243  | M87736  | 0.2                  | 152-172        |
|      |       | Sex     | NA      | 0.2                  | 150 and/or 180 |

\*M5 composition was slightly different for samples collected in SEN and GB. For SEN, locus D4S243 was co-amplified with locus D21S1442 (the latter was excluded from the analyses in this work). For GB, locus D4S243 was co-amplified with primers for the sex determination protocol (Sex). M2 included D1S533 (GenBank code G07788) for both SEN and GB, which was excluded from the analyses carried out in this work.

PCR cycling conditions started with a HotStarTaq DNA Polymerase activation step, during 15 min at 95°C, followed by denaturation step at 94°C for 30 sec,



Supporting Information: Disrupted dispersal and its genetic consequences: comparing protected and threatened baboon populations (*Papio papio*) in West Africa

annealing step for 40 sec at between 50°C to 59°C (according to each multiplex) and extension at 72°C for 60 sec, repeated 40 cycles. The PCR ended with a final extension of 30 min at 72°C.

### **Genotyping process**

Genotyping followed a modified multi-tubes approach and four amplifications per locus and sample were conducted (producing 95% confidence in consensus genotypes, Ferreira da Silva et al. 2014). Only samples with a quality index (QI) (Miquel et al. 2006) above 0.50 were considered (i.e. half of the PCRs yielded the same peaks as in the consensus). A subset of GB and SEN samples were genotyped using Kopp's et al. (2015) and Ferreira da Silva's et al. (2014) amplification protocols to score alleles consistently between datasets.

Test for repeated individuals was performed using Excel microsatellite toolkit (Park, 2001) and GIMLET v1.3.3 (Valière, 2002), allowing for one mismatch or two for samples being distinguished by only one locus with a homozygote genotype.

### **References**

- Miquel C, Bellemain E, Poillot C, Bessi re J, Durand A, Taberlet P. 2006. Quality indexes to assess the reliability of genotypes in studies using noninvasive sampling and multiple-tube approach. *Molecular Ecology Notes* 6(4): 985–988
- Broquet T, Petit E. 2004. Quantifying genotyping errors in noninvasive population genetics. *Molecular Ecology* 13:3601–3608.
- Park, S. D. E. 2001. *Trypanotolerance in West African Cattle and the Population Genetic Effects of Selection* University of Dublin.



Supporting Information: Disrupted dispersal and its genetic consequences: comparing protected and threatened baboon populations (*Papio papio*) in West Africa

Valière, N. and Berthier, P. and Mouchiroud, D. and Pontier, D. 2002. Gemini: software for testing the effects of genotyping errors and multitubes approach for individual identification. *Molecular Ecology Notes* 2: 83-86.

Waits, L. P. and Luikart, G. and Taberlet, P. 2001. Estimating the probability of identity among genotypes in natural populations: cautions and guidelines *Molecular Ecology* (10): 249–256.
